# Supplementary material for: The role of traffic emissions in particulate organics and nitrate at a downwind site in the periphery of Guangzhou, China
Source: Copernicus journal article supplement (doi:10.5194/acp-2017-116), 2017-03-15
Supplement: Supplementary file 1 [file acp-2017-116-supplement.pdf]

## Supplementary information for:

### **The role of traffic emissions in particulate organics and nitrate at a downwind site in the periphery of Guangzhou, China**

Yi Ming Qin<sup>1</sup>, Hao Bo Tan<sup>2</sup>, Yong Jie Li<sup>3,\*</sup>, Misha I. Schurman<sup>4</sup>, Fei Li<sup>2</sup>, Francesco Canonaco<sup>5</sup>, André S. H. Prévôt<sup>5</sup>, Chak K. Chan<sup>1,4,6,\*</sup>

<sup>1</sup>Department of Chemical and Biomolecular Engineering, Hong Kong University of Science and Technology, Hong Kong, China

<sup>2</sup>Institute of Tropical and Marine Meteorology, China Meteorological Administration, Guangzhou, China

<sup>3</sup>Faculty of Science and Technology, University of Macau, Taipa, Macau, China

<sup>4</sup>Division of Environment, Hong Kong University of Science and Technology, Hong Kong, China

<sup>5</sup>Laboratory of Atmospheric Chemistry, Paul Scherrer Institute, 5232, Villigen PSI, Switzerland

<sup>6</sup>School of Energy and Environment, City University of Hong Kong, Hong Kong, China

#### \*To Whom Correspondence Should be Addressed

Chak K. Chan: AC1-G5716, School of Energy and Environment, City University of Hong Kong, Tat Chee Avenue, Kowloon, Hong Kong, China  
Tel: (852) 3442-5593; Fax: (852) 3442-0688  
Email: [chak.k.chan@cityu.edu.hk](mailto:chak.k.chan@cityu.edu.hk)

Yong Jie Li: E11-3017, Faculty of Science and Technology, University of Macau, E11, Avenida da Universidade, Taipa, Macau, China  
Tel: (853) 8822-4943; Fax: (853) 8822-2426  
Email: [yongjieli@umac.mo](mailto:yongjieli@umac.mo)

**Text:**

**Text S1:** Diurnal Patterns of meteorological conditions and gas and particle species.

Diurnal patterns for temperature, RH, irradiance (IR), NO<sub>x</sub>, O<sub>3</sub>, all NR-PM<sub>1</sub> species, and BC in November and December are depicted in Figure S11. IR, an indicator of photochemical activities, showed a clear noon time peak in November. Ozone concentration is also closely linked to the extent of photochemical oxidation in an air mass because O<sub>3</sub> production results from OH reactions with VOCs and CO. In general, ozone concentration slowly increases after sunrises and reaches its maximum in mid-afternoon. In November, both IR and O<sub>3</sub> were relatively high at noon time, indicating the strong photochemical activities. Obvious diurnal cycles of temperature and RH were observed. SO<sub>2</sub> had morning peaks while NO<sub>x</sub> showed clear rush hour peaks. Sulfate showed a slight concentration increase in median hourly data in the early morning in November, consistent with the SO<sub>2</sub> morning peaks. The daytime decrease in nitrate and chloride in November may due to the combinative effects of higher mixing layer height and gas-to particle partitioning under high temperature and low RH conditions (Seinfeld and Pandis, 2006). Ammonium concentration decreased in the early morning and increased in late afternoon, which was the combined result of the variations of anions in the particle (SO<sub>4</sub>, NO<sub>3</sub> and Cl). Organics had a significant increase after 16:00, and stayed at a high level at night, which might be attributed to combined effects of enhanced vehicular emissions and lower mixing layer height. Other vehicle-related pollutants such as NO<sub>x</sub> and BC also showed an increase in concentrations after 16:00. Also, a small organics peak appeared in the afternoon, coincided with the peak of O<sub>3</sub>, suggesting the possibility of photochemical formation of SOA. The diurnal patterns of individual organic factors as characterized by ME-2 which will be discussed in a later section. Similar diurnal variations for most of the PM<sub>1</sub> species in November were also observed in the earlier field campaign conducted in November in Shenzhen (He et al., 2011).

In December, although O<sub>3</sub> concentrations were significantly lower than those in November, the daytime peak was still obvious. Both temperature and RH were lower in December than in November while obvious diurnal cycles of temperature and RH were also observed. No obvious diurnal variation for SO<sub>2</sub> were observed in December. NO<sub>x</sub> still showed clear rush hour peaks. However, a discrepancy between mean and median data in diurnal patterns for NO<sub>x</sub> was apparent during night to early morning in December because of intense traffic emissions on 24-25

December, as also shown in the high NO<sub>x</sub> concentrations in Figure 1. SO<sub>4</sub> slightly increased at night, which might be attributed to the lower mixing layer height during nighttime. However, nitrate concentration did not experience a significant decrease, while the daytime decrease in chloride is still obvious. Other contributing factors of nitrate may somewhat offset the decrease due to higher mixing layer height and evaporation from particles in daytime. Ammonium concentration increased in late afternoon, which was the combined result of the variations of anions in the particle. Organics had a significant increase after 16:00, stayed at a high level at night, and tracked well with vehicle-related pollutants such as NO<sub>x</sub> and BC.

#### Text S2: Organic nitrate and inorganic nitrate estimation

To examine the contribution of organic nitrate (ON) to nitrate measured by the HR-ToF-AMS, we adopted two methods to estimate the ON concentration. The first method (Method 1) is based on the ratio of NO<sup>+</sup>/NO<sub>2</sub><sup>+</sup> (Farmer et al., 2010), which makes use of the difference in NO<sup>+</sup>/NO<sub>2</sub><sup>+</sup> ratios for organic nitrates and ammonium nitrate in the AMS spectra. The fraction of the total nitrate signal due to organic nitrates (x) can be derived from:

$$x = \frac{(R_{obs} - R_{NH_4NO_3})(1 + R_{ON})}{(R_{ON} - R_{NH_4NO_3})(1 + R_{obs})} \quad (1)$$

where  $R_{obs}$  is the NO<sup>+</sup>/NO<sub>2</sub><sup>+</sup> ratio in the mass spectra,  $R_{NH_4NO_3}$  is the NO<sup>+</sup>/NO<sub>2</sub><sup>+</sup> ratio of ammonium nitrate in IE calibrations, while  $R_{ON}$  is the NO<sup>+</sup>/NO<sub>2</sub><sup>+</sup> ratio of ON. Xu et al.(2015) used the NO<sup>+</sup>/NO<sub>2</sub><sup>+</sup> ratios of 5 and 10, which likely correspond to the upper and lower bounds of the ratios from ON. This method using NO<sup>+</sup>/NO<sub>2</sub><sup>+</sup> is adopted in this study for the estimation of contributions for organic nitrates to the AMS-measured nitrate signals. The concentrations of organic nitrates can be derived by multiplying the organic nitrate fraction (x) with the total nitrate measured by the AMS. And inorganic nitrate can then be calculated by subtracting the organic nitrates from the total nitrate concentrations. But still, we should be cautious when using this method, as the vast array of possible ON parent compounds in ambient particles and the variation of the NO<sup>+</sup>/NO<sub>2</sub><sup>+</sup> ratios between instruments may lead to some bias in the calculation. We also use the organic concentrations and elemental ratios (OM:OC and N:C) from the HR-ToF-AMS measurement to estimate the lower bound of concentrations for organic nitrates (Method 2) adopted from Schurman et al.(2015).

$$ON_{min} = (\text{Organics}/\text{OM:OC}) * \text{N:C} * (14/12) \quad (2)$$

where Organics is total organic concentration. ON may be underestimated using this method as N:C includes only N from CHON and CHN fragments. The maximum inorganic nitrate can also be estimated by deducting the  $ON_{min}$  from the total nitrate concentration using this method. The time series of total nitrate from AMS and MAGRA, and inorganic nitrate and organic nitrate calculated from Method 1 and Method 2 are shown in Fig. S12, while the campaign average mass concentration and mass fraction derived from each method are shown in Fig. S13-S14. On average, the maximum IN concentration estimated from Method 1 was  $6.15 \mu\text{g}/\text{m}^3$ , accounted for 81.2% of the total nitrate mass concentration from AMS measurement. And the minimum IN concentration from Method 1 was  $4.95 \mu\text{g}/\text{m}^3$ , contributed to 74.4% of the total nitrate mass. While using Method 2, the minimum nitrate was  $6.48 \mu\text{g}/\text{m}^3$ , accounted for 89.8 % of the total nitrate. And the time series of the calculated inorganic nitrate tracked well with the total AMS measured nitrate (Fig. S12). Fig. 8 shows the scatter plot of estimated inorganic nitrate versus total AMS measured nitrate. We found that the estimated inorganic nitrate was highly correlated with ( $R_p^2 \geq 0.95$ ) the total AMS nitrate concentration and followed the 1 to 1 line for each method we used. Even though organic nitrates also contributed to the total nitrate we measured, both the variation and the concentration of the nitrate did not change significantly after subtracting the organic nitrates. Furthermore, as shown in Fig. S2, AMS measured nitrate were comparable to those from MAGRA, with a correlation slope of 0.9 and an  $R_p$  of 0.95. Given the uncertainties associated with each estimation, we prefer to use the total HR-ToF-AMS nitrate concentration in our discussion.

## Figures and Tables:

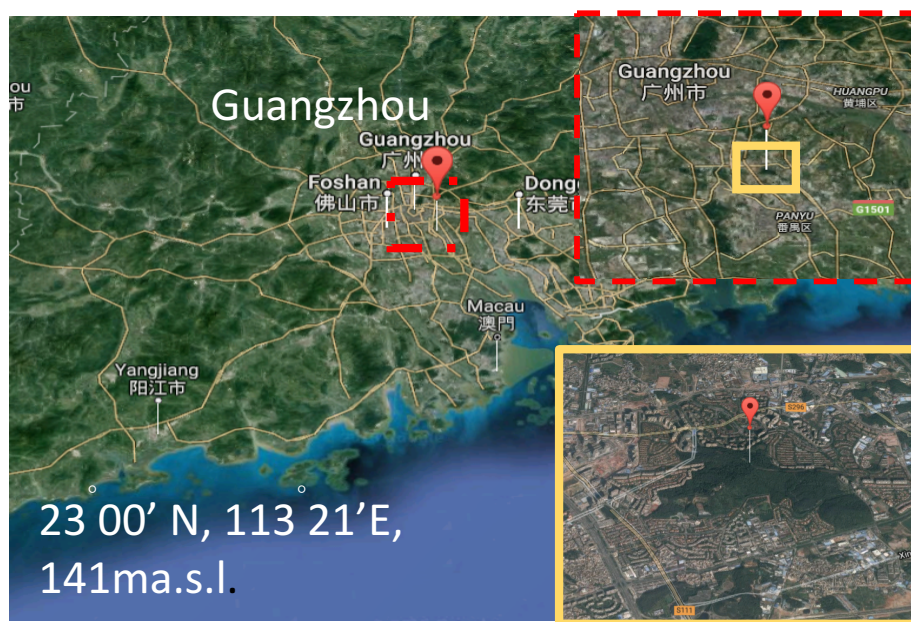

Figure S 1 Location of sampling site

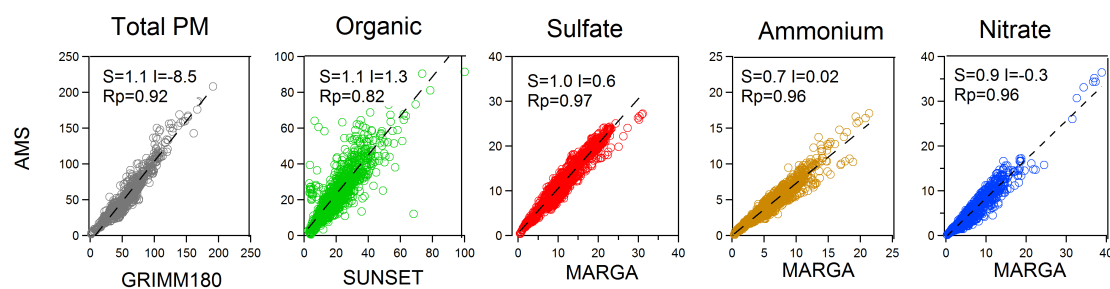

Figure S 2 AMS data comparison

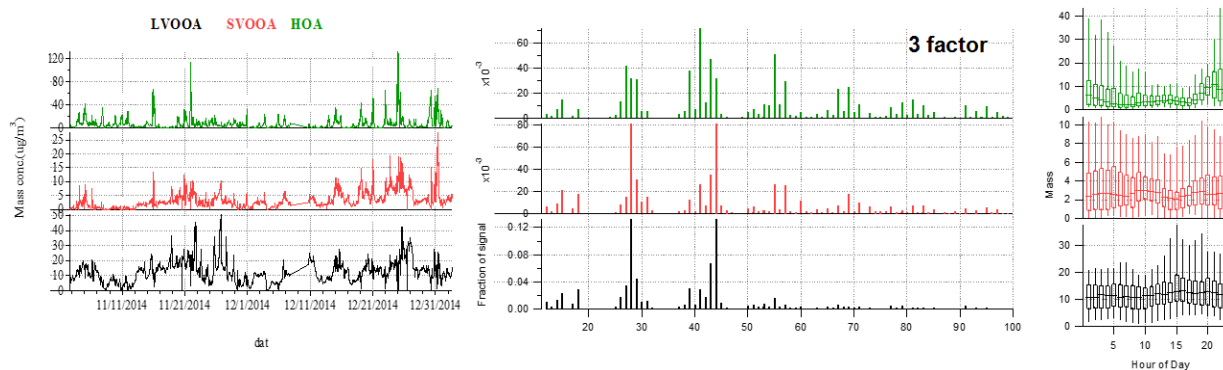

Figure S 3 Three factors PMF solution

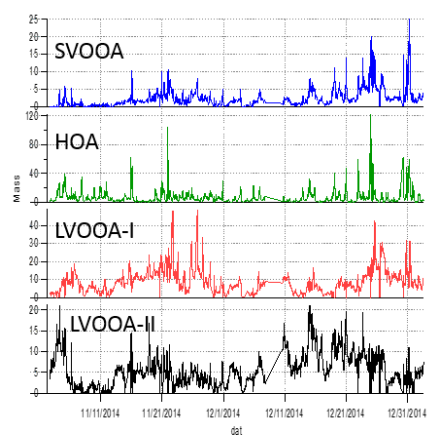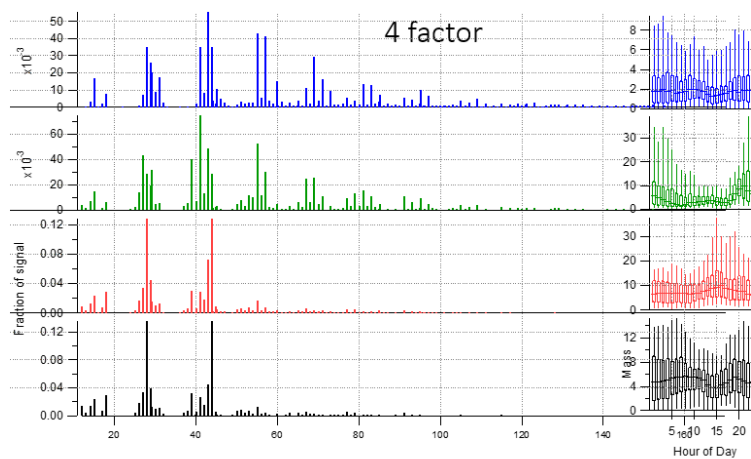

Figure S 4 Four factors PMF solution

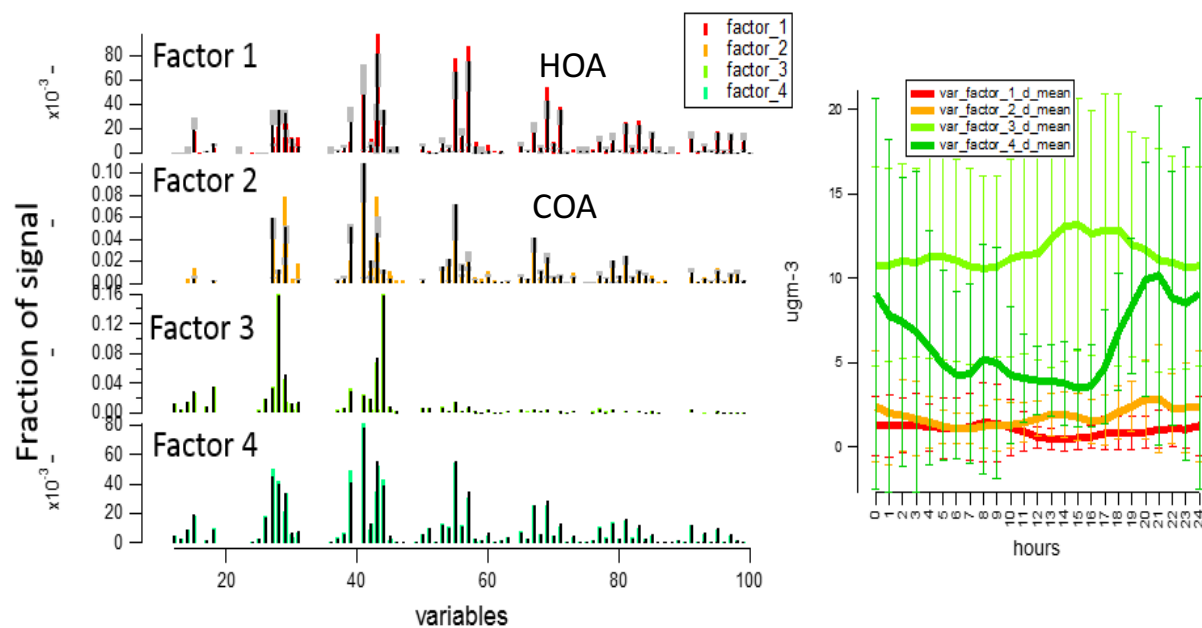

92

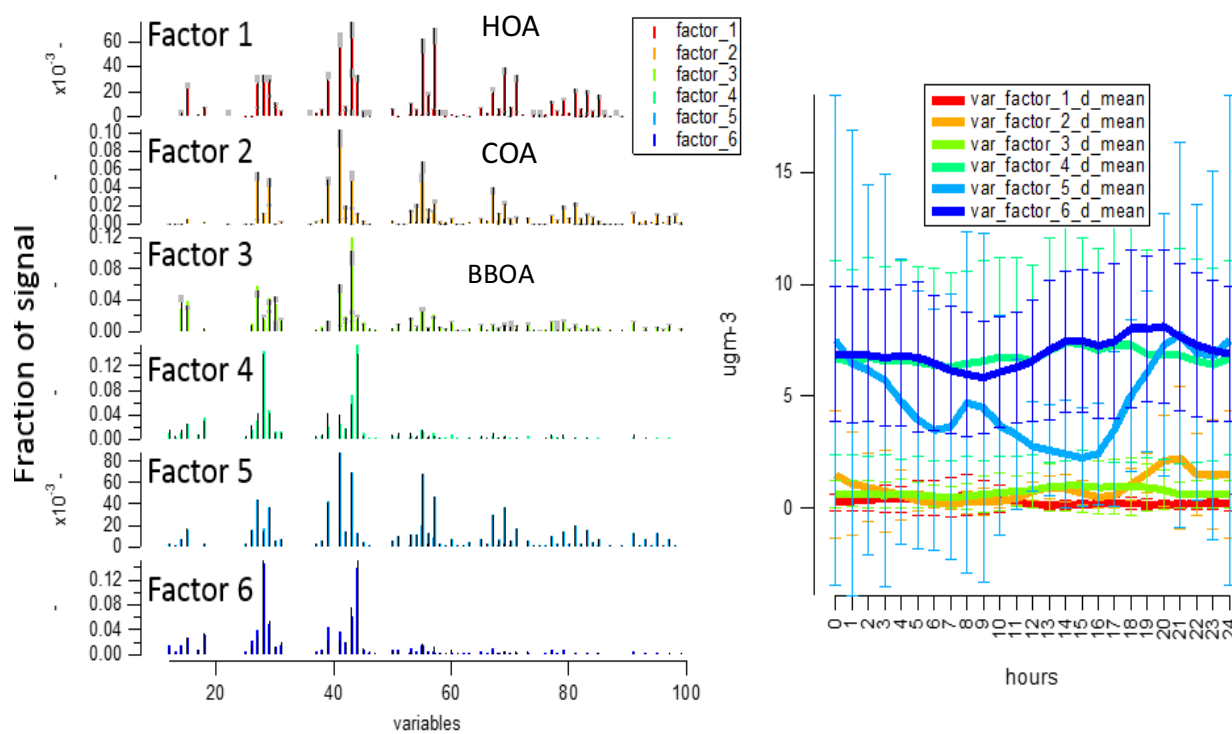

93

94

95

Figure S5 Factor profiles and diurnal variations in ME-2 trials. upper panel: four factor solution with constraining HOA and COA. bottom panel: six factor solution with constraining HOA, COA and BBOA.

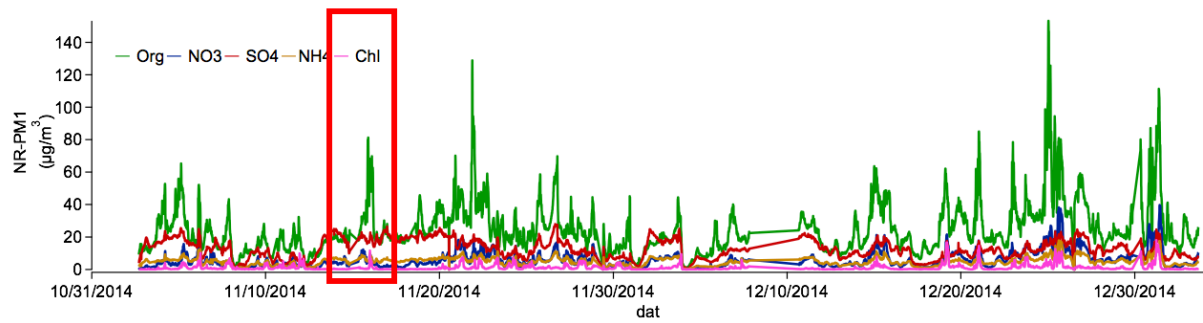

96

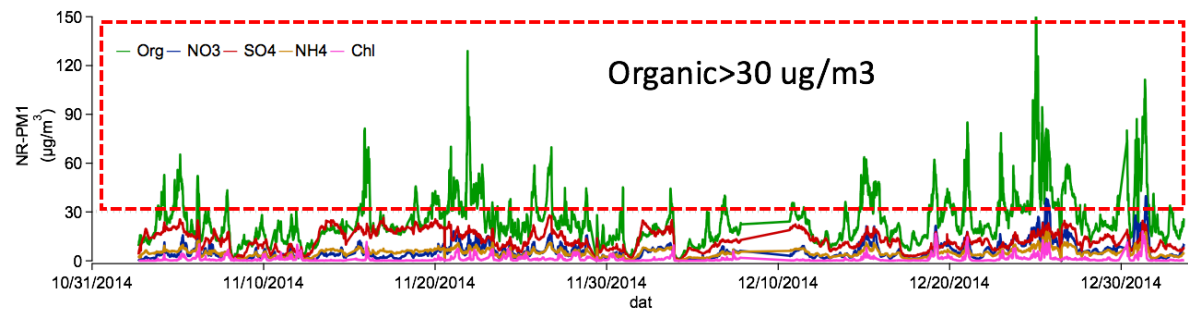

97

98 *Figure S 6 Organic peaks during the campaign*



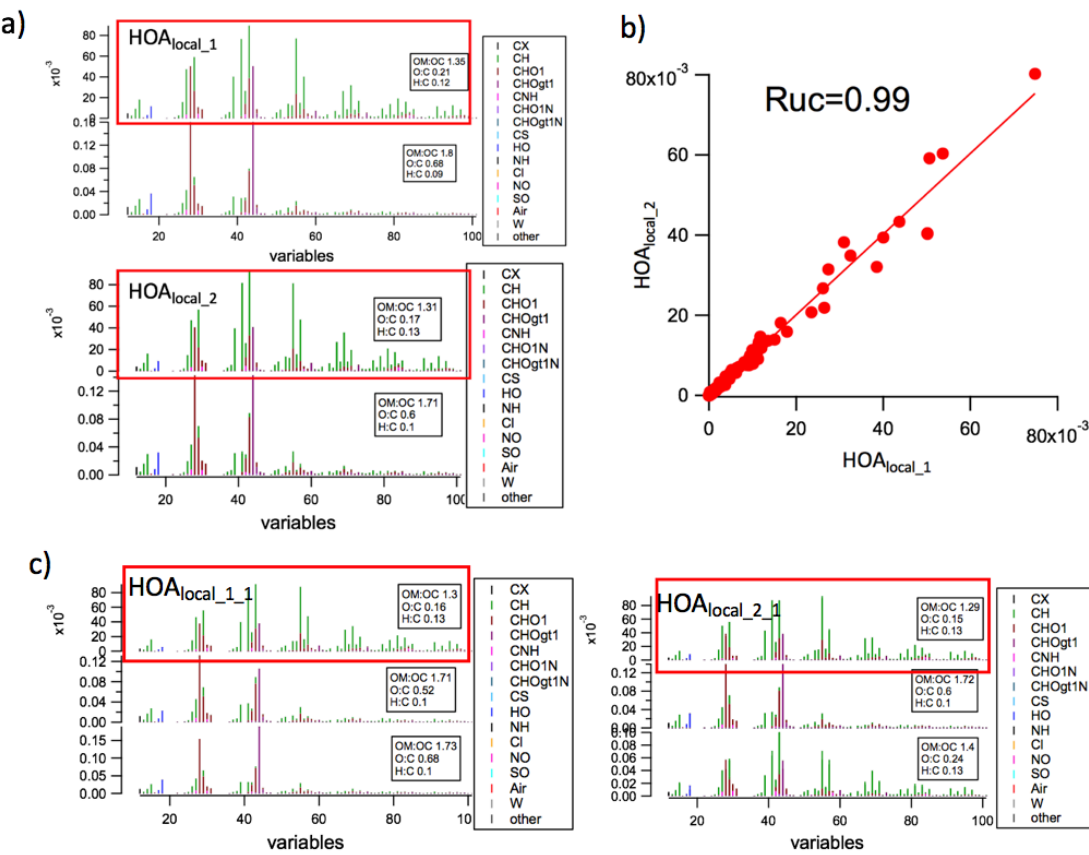

Figure S 7 Local HOA source profile comparison

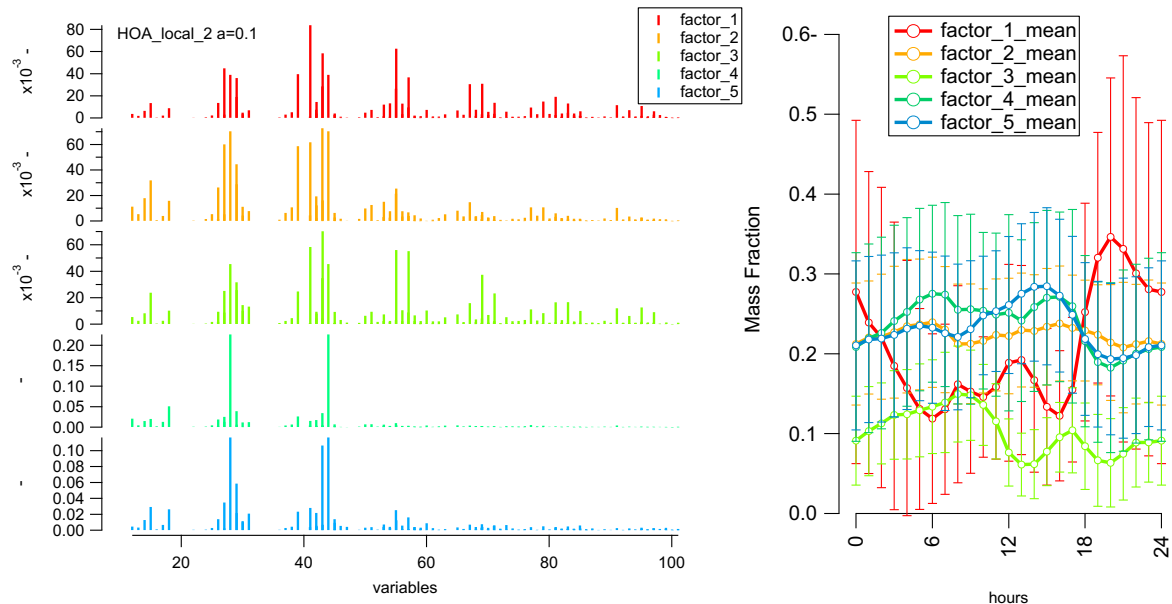

Figure S 8 Five factor solution with HOA constrain

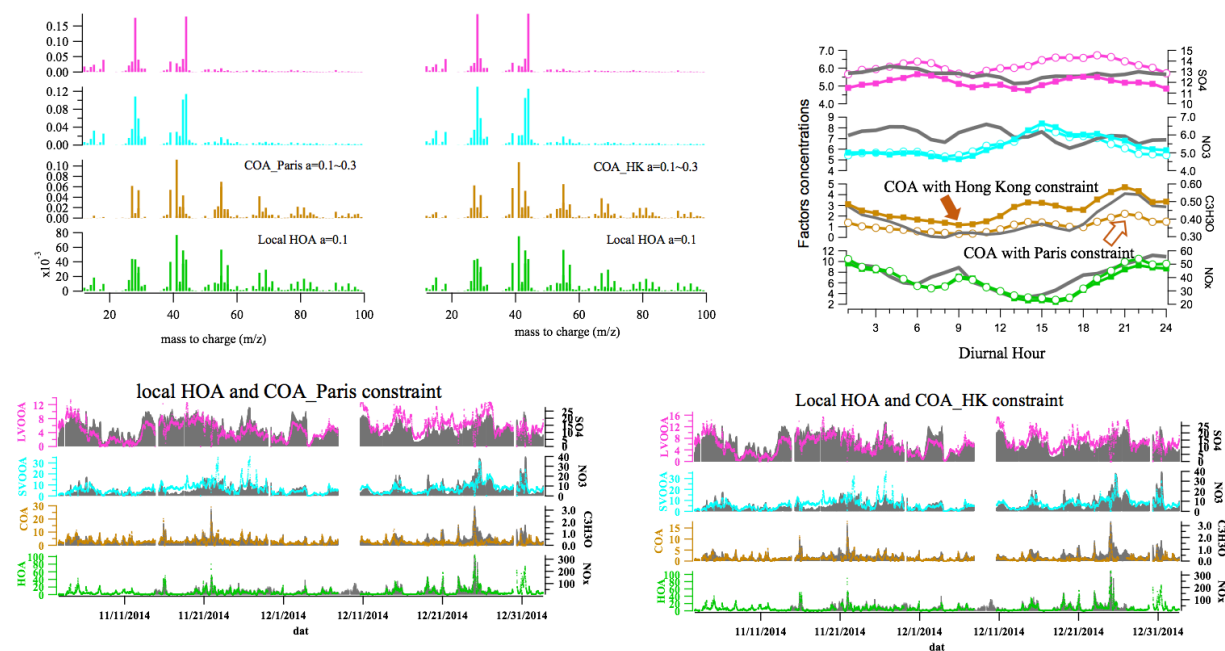

Figure S 9 ME-2 results comparison using the two COA source profile as constraint

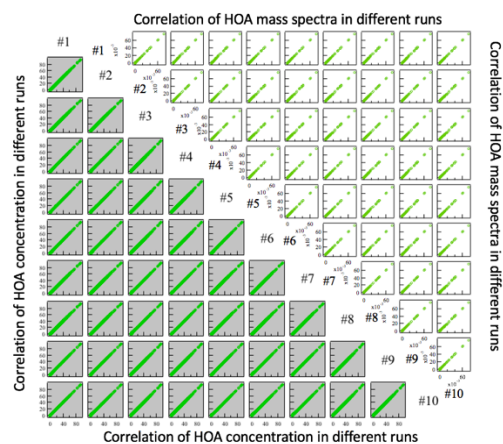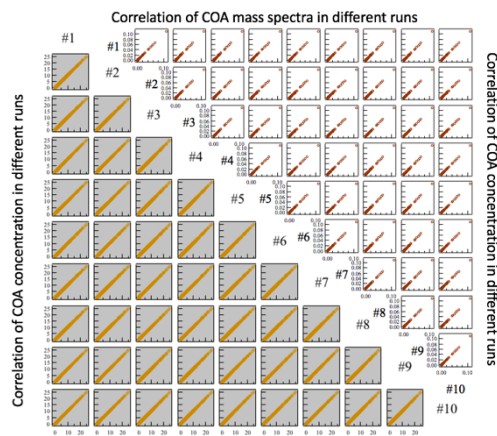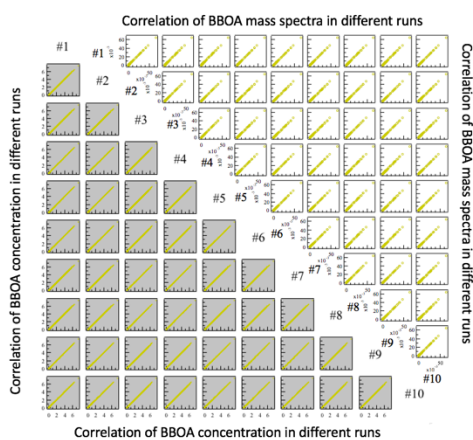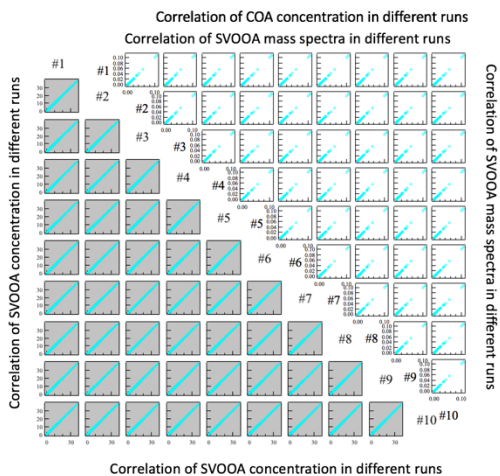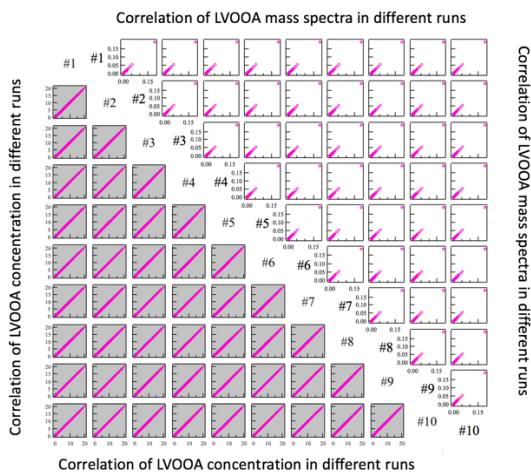

Figure S 10 Correlation of the time series and mass spectra for ten runs with optimal solution.

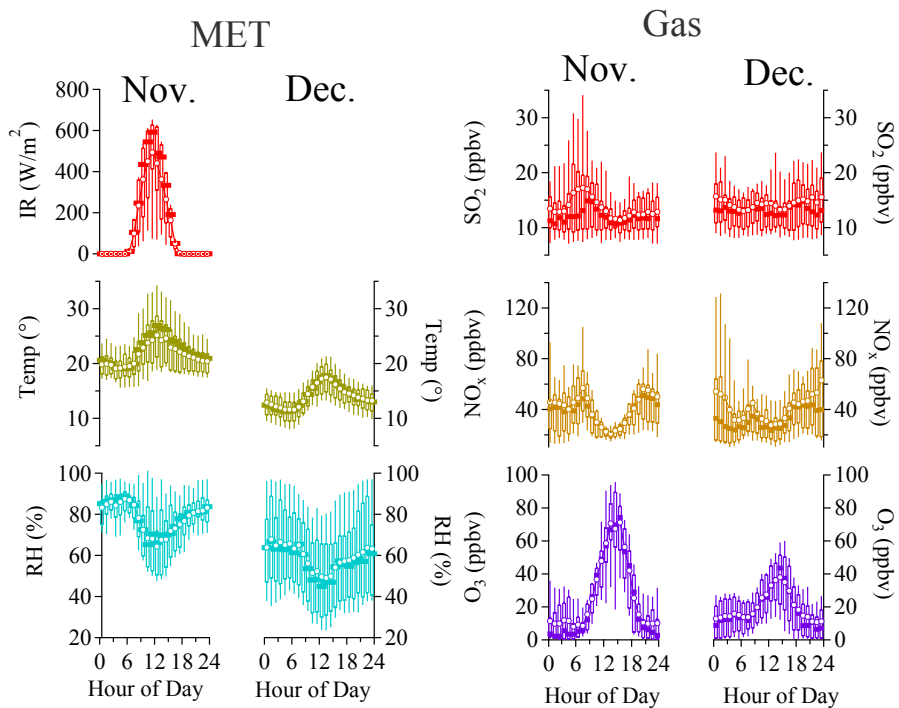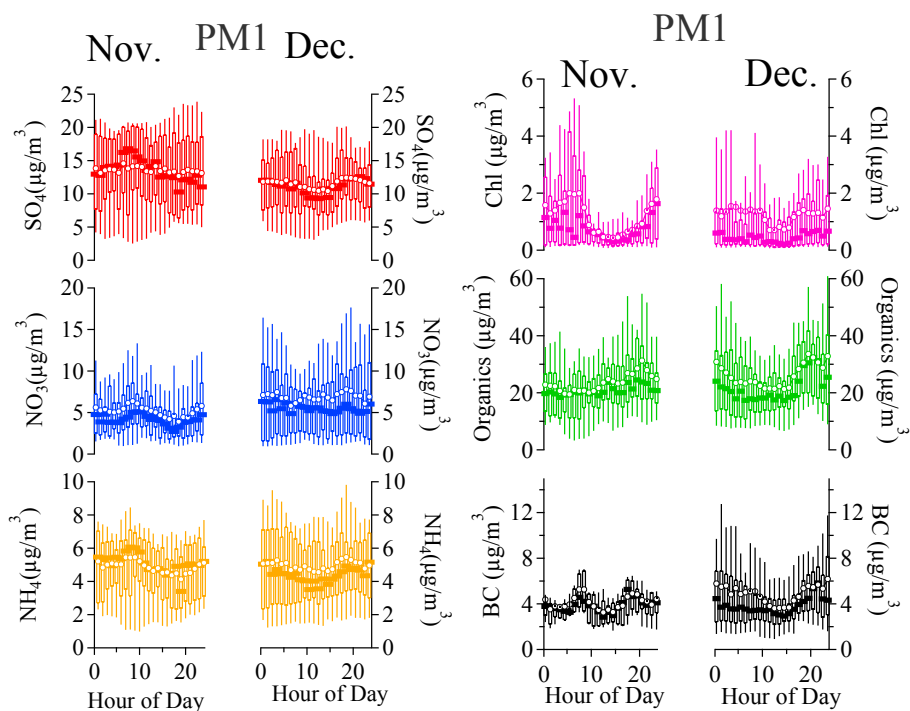

Figure S 11 Diurnal patterns for temperature, RH, Irradiance, NO<sub>x</sub>, O<sub>3</sub>, all NR-PM<sub>1</sub> species, and BC in Nov. and Dec. (25th and 75th percentile boxes, 5th and 95th percentile whiskers, median as line in solid dot, and mean as cycle). There is no Irradiance data available in December

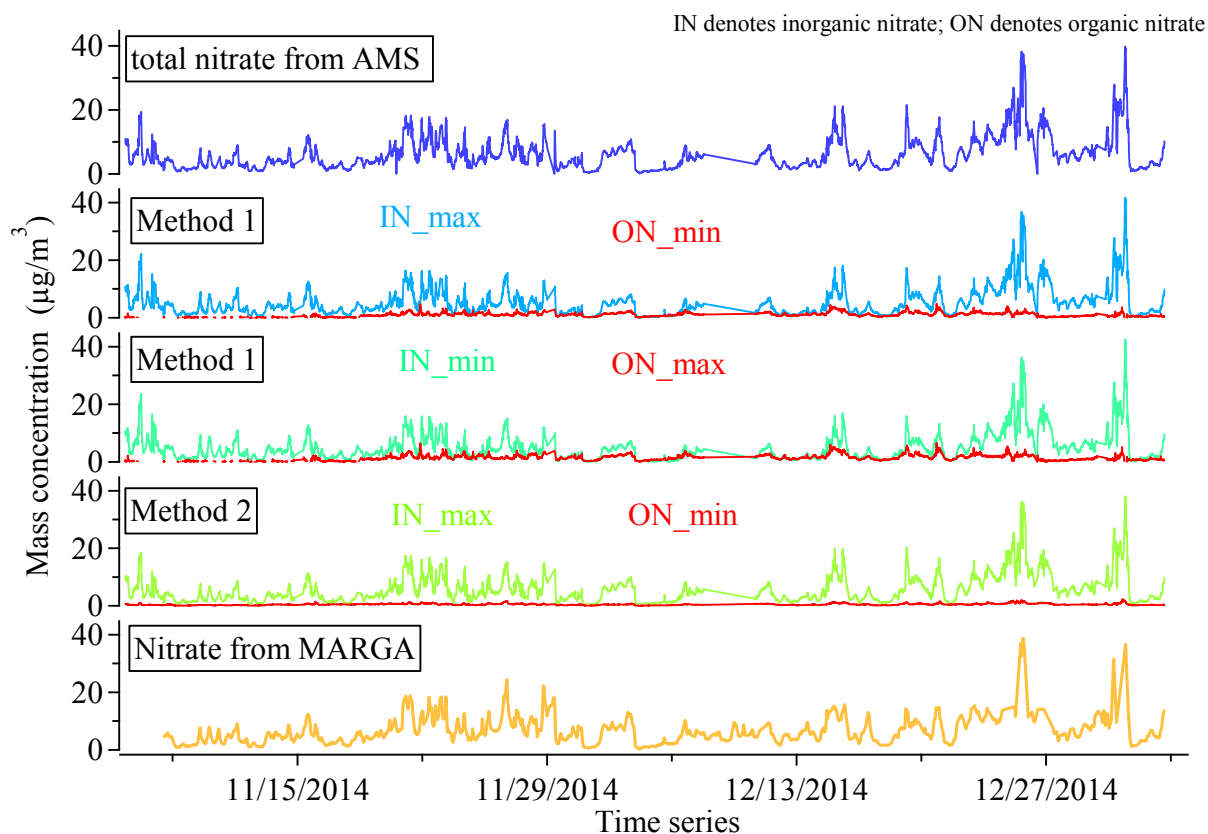

Figure S 12 Time series of total nitrate from AMS and MARGA and , inorganic nitrate and organic nitrate calculated from Method 1 and Method 2. IN denotes inorganic nitrate and ON denotes organic nitrate.

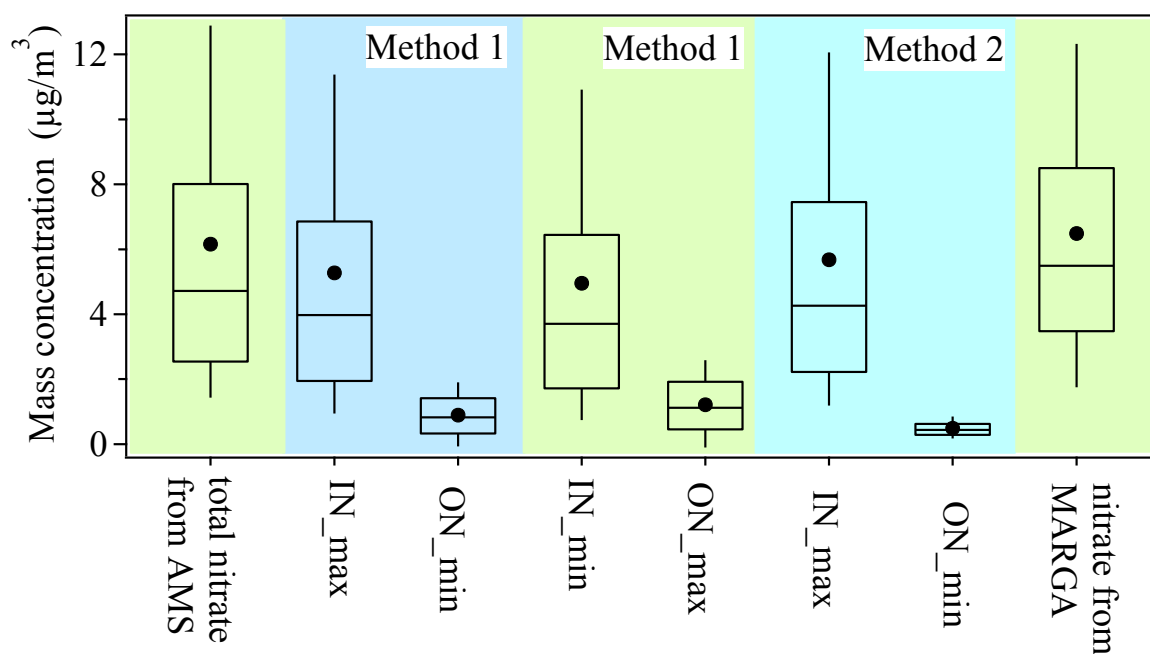

Figure S13 Box and whisker plot of nitrate mass concentration from AMS and MAGRA, and inorganic nitrate and organic nitrate calculated from Method 1 and Method 2 (25th and 75th percentile boxes, 10th and 90th percentile whiskers, median as line in solid line, and mean as dot).

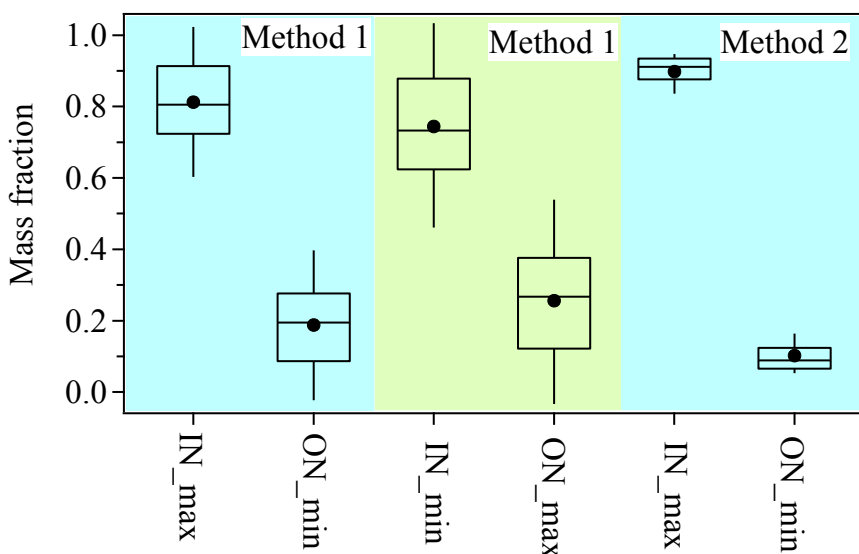

Figure S14 Box and whisker plot of inorganic nitrate and organic nitrate mass fraction calculated from Method 1 and Method 2 (25th and 75th percentile boxes, 10th and 90th percentile whiskers, median as line in solid line, and mean as dot).

Table S 1 Correlation of ME-2 resolved OA factors with tracers

| Correlation ( $R_p$ ) | NO <sub>x</sub> | C <sub>3</sub> H <sub>3</sub> O | C <sub>2</sub> H <sub>4</sub> O <sub>2</sub> | NO <sub>3</sub> | SO <sub>4</sub> |
|-----------------------|-----------------|---------------------------------|----------------------------------------------|-----------------|-----------------|
| HOA                   | 0.83            | 0.84                            | 0.81                                         | 0.58            | 0.18            |
| COA                   | 0.51            | 0.66                            | 0.42                                         | 0.08            | 0.08            |
| BBOA                  | 0.18            | 0.47                            | 0.71                                         | 0.52            | 0.33            |
| LVOOA                 | -0.01           | 0.31                            | 0.42                                         | 0.43            | 0.7             |
| SVOOA                 | 0.21            | 0.66                            | 0.62                                         | 0.68            | 0.49            |

## Reference:

- Farmer, D. K., Matsunaga, a, Docherty, K. S., Surratt, J. D., Seinfeld, J. H., Ziemann, P. J. and Jimenez, J. L.: Response of an aerosol mass spectrometer to organonitrates and organosulfates and implications for atmospheric chemistry., *Proc. Natl. Acad. Sci. U. S. A.*, 107(15), 6670–6675, doi:10.1073/pnas.0912340107, 2010.
- He, L.-Y., Huang, X.-F., Xue, L., Hu, M., Lin, Y., Zheng, J., Zhang, R. and Zhang, Y.-H.: Submicron aerosol analysis and organic source apportionment in an urban atmosphere in Pearl River Delta of China using high-resolution aerosol mass spectrometry, *J. Geophys. Res.*, 116(D12), D12304, doi:10.1029/2010JD014566, 2011.
- Schurman, M. I., Lee, T., Desyaterik, Y., Schichtel, B. A., Kreidenweis, S. M. and Collett, J. L.: Transport, biomass burning, and in-situ formation contribute to fine particle concentrations at a remote site near Grand Teton National Park, *Atmos. Environ.*, 112, 257–268, doi:10.1016/j.atmosenv.2015.04.043, 2015.
- Seinfeld, J. H. and Pandis, S. N.: *ATMOSPHERIC From Air Pollution to Climate Change SECOND EDITION.*, 2006.
- Xu, L., Suresh, S., Guo, H., Weber, R. J. and Ng, N. L.: Aerosol characterization over the southeastern United States using high-resolution aerosol mass spectrometry: spatial and seasonal variation of aerosol composition and sources with a focus on organic nitrates, *Atmos. Chem. Phys.*, 15(13), 7307–7336, doi:10.5194/acp-15-7307-2015, 2015.
